# Supplementary material for: A Highly Polymorphic Copy Number Variant in the NSF Gene is Associated with Cocaine Dependence
Source: PubMed Central journal article supplement (PMC4976312; doi:10.1038/srep31033), 2016-08-08
Supplement: srep31033-s1.pdf [file srep31033-s1.pdf]

## A HIGHLY POLYMORPHIC COPY NUMBER VARIANT IN THE *NSF* GENE IS ASSOCIATED WITH COCAINE DEPENDENCE

Judit Cabana-Domínguez<sup>1,2,3</sup>, Carlos Roncero<sup>4,5,6,7</sup>, Lara Grau-López<sup>4,5,6,7</sup>, Laia Rodríguez-Cintas<sup>5,6</sup>, Carmen Barral<sup>4,5,6,7</sup>, Alfonso C. Abad<sup>4,5</sup>, Galina Erikson<sup>8</sup>, Nathan E. Wineinger<sup>8</sup>, Bàrbara Torrico<sup>1,2,3</sup>, Concepció Arenas<sup>9</sup>, Miquel Casas<sup>4,6,7</sup>, Marta Ribasés<sup>4,7,10</sup>, Bru Cormand<sup>\*1,2,3</sup> & Noèlia Fernández-Castillo<sup>\*1,2,3</sup> &

**Supplementary Table S1.** Association study of CNV in the *NSF* gene in cocaine dependent Spanish patients.

| Number of copies | Discovery      |             | Replication    |             | Pooled analysis <sup>1</sup> |             |
|------------------|----------------|-------------|----------------|-------------|------------------------------|-------------|
|                  | Controls N (%) | Cases N (%) | Controls N (%) | Cases N (%) | Controls N (%)               | Cases N (%) |
| <b>2</b>         | 92 (25.8)      | 118 (32.9)  | 150 (26.4)     | 152 (29.9)  | 242 (26.2)                   | 270 (31.5)  |
| <b>3</b>         | 134 (37.6)     | 141 (39.3)  | 199 (35.0)     | 201 (39.6)  | 333 (36.0)                   | 342 (39.9)  |
| <b>4</b>         | 87 (24.4)      | 75 (20.9)   | 134 (23.6)     | 103 (20.3)  | 221 (23.9)                   | 178 (20.7)  |
| <b>5</b>         | 33 (9.3)       | 22 (6.1)    | 62 (10.9)      | 37 (7.3)    | 95 (10.3)                    | 59 (6.9)    |
| <b>6</b>         | 10 (2.8)       | 3 (0.8)     | 24 (4.2)       | 15 (3)      | 34 (3.7)                     | 18 (2.1)    |
| <b>SUM</b>       | 356            | 359         | 569            | 508         | 925                          | 867         |
| <b>p-value</b>   | <b>0.03696</b> |             | 0.06021        |             | <b>0.00134</b>               |             |

In bold: significant p-values. <sup>1</sup> Discovery + replication samples.

**Supplementary Table S2.** Haplotype frequencies.

---

| <b>rs183211</b> | <b>CNV</b> | <b>Frequencies</b> |
|-----------------|------------|--------------------|
| A               | 1          | 0.045              |
| A               | 2          | 0.235              |
| A               | 3          | 0.022              |
| G               | 1          | 0.515              |
| G               | 2          | 0.101              |
| G               | 3          | 0.083              |

---

**Supplementary Table S3.** Primer sequences used in qRT-PCR assays.

| Gene         | Region or transcript |                        | Nucleotide sequence (5'→3') |
|--------------|----------------------|------------------------|-----------------------------|
| <i>ALB</i>   | Intron 12            | Fw                     | TTGTGGGCTGTAATCATCG         |
|              |                      | Rv                     | TGCTGGTTCTCTTTCCTGAC        |
| <i>GAPDH</i> | GAPDH_001            | Fw                     | AGCCACATCGCTCAGACAC         |
|              |                      | Rv                     | GCCCAATACGACCAATCC          |
| <i>HPRT1</i> | HPRT1_001            | Fw                     | TGATAGATCCATTCTATGACTGTAGA  |
|              |                      | Rv                     | CAAGACATTCTTCCAGTTAAAGTTG   |
| <i>NSF</i>   | Exon 2               | Fw                     | GGCAAGATGTCCTACAGATGAA      |
|              |                      | Rv                     | CGAATGCCACTTAGCAGGTTA       |
|              | Exon 13              | Fw                     | GCAAGTGACGAGAGGAGAC         |
|              |                      | Rv                     | TGGCACTTACTTTTCGCTG         |
|              | Intron 13            | Fw                     | GAGGGTTTGAGTCTGGTGGA        |
|              |                      | Rv                     | AGCCTGGAAAGCAAAACAAC        |
|              | NSF_001 + NSFP1_001  | Fw                     | CCCCCAGGTTGTGGTAAGAC        |
|              |                      | Rv                     | ACTGTTAGCACCAAGCCTCC        |
| NSF_001      | Fw                   | GCTGATCGAGATGTCCCTAC   |                             |
|              | Rv                   | CTTCAGGCAAAGAGAATACCAG |                             |
| NSF_002      | Fw                   | ACTGAAGACACATCCATCGGT  |                             |
|              | Rv                   | TACCATAACTATTTCTTCCC   |                             |
| NSF_003      | Fw                   | GCCACAGGAGAGCAGC       |                             |
|              | Rv                   | CCTTGCTTGGTCTCTCGG     |                             |
